# Supplementary material
Source: Springer Nature journal article supplement (https://www.springermedizin.de/resource/supplementary/12991_2009_1026_MOESM4_ESM.pdf/9615608)
Supplement: MOESM4 [file 9615608]

### Model A

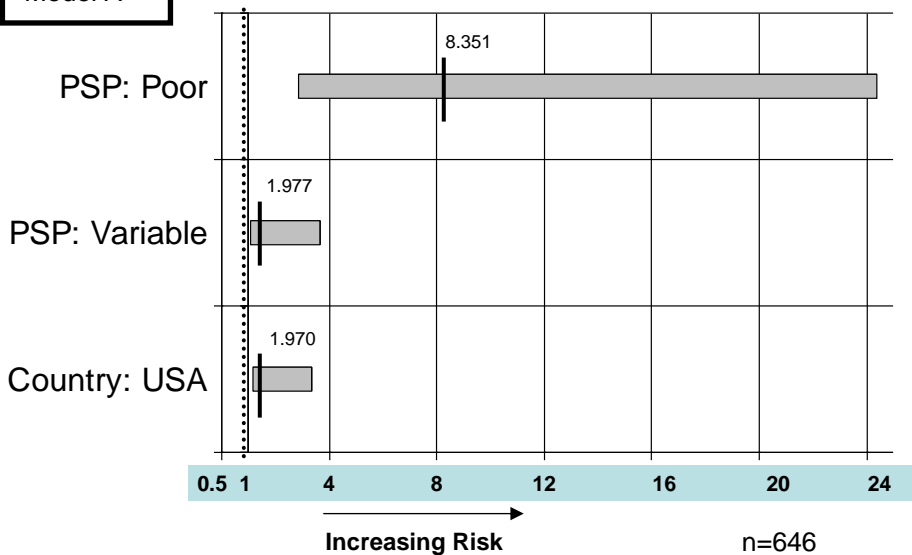

Poorest functioning <31

Variable functioning  $\geq 31$  and <71

Highest functioning  $\geq 71$

Model A Reference Groups:

High Functioning for PSP, non-US for Country.

### Model B

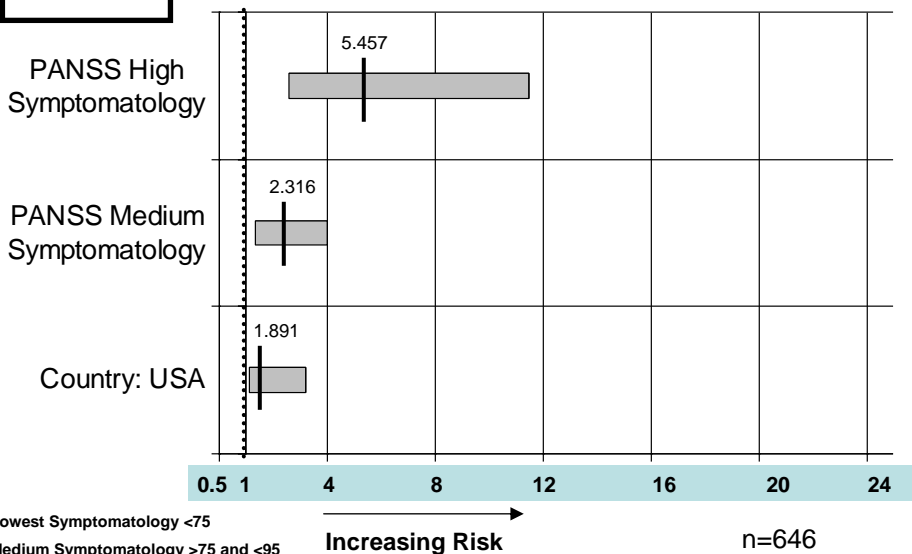

Lowest Symptomatology <75

Medium Symptomatology  $\geq 75$  and <95

Highest Symptomatology  $\geq 95$

Model B Reference Groups:

Lowest Symptomatology for PANSS, non-US for Country.
